# Supplementary material for: Bcl-xL Inhibition Disrupts p27 Stability and Promotes Senescence Escape: Insights for Cancer Senotherapy
Source: Research Square preprint supplement (doi:10.21203/rs.3.rs-7250116/v1), 2025-08-18
Supplement: Supplementary file 1 [file 178a3ea41904c30ae9733b83.docx]

**Bcl-xL Inhibition Disrupts p27 Stability and Promotes Senescence Escape: Insights for Cancer Senotherapy**

Xiaobai He1,2#; Xiaopan Chen1#; XinYi Qian1; Di Cui3; SongLin Zhang1; Xiuli Yang4; Weijiao Fan5; Nan Huang6; Miaomiao Du2; Linjie Chen2*; Leixiang Yang1,2*

1. Cancer Center, Department of Genetic and Genomic Medicine, Zhejiang Provincial People's Hospital (Affiliated People's Hospital), Hangzhou Medical College, Hangzhou, Zhejiang, China.
2. Department of Clinical Laboratory and Bioengineering, Hangzhou Medical College, Hangzhou, China.
3. The Key Laboratory of Tumor Molecular Diagnosis and Individualized Medicine of Zhejiang Province, Zhejiang Provincial People's Hospital (Affiliated People's Hospital), Hangzhou Medical College, Hangzhou, China.
4. Center for Clinical Pharmacy, Cancer Center, Department of Pharmacy, Zhejiang Provincial People's Hospital (Affiliated People's Hospital), Hangzhou Medical College, Hangzhou, China
5. Clinical Research Institute, Key Laboratory of Tumor Molecular Diagnosis and Individualized Medicine of Zhejiang Province, Zhejiang Provincial People's Hospital (Affiliated People's Hospital), Hangzhou Medical College, Hangzhou, China
6. Department of Clinical Laboratory, Li’an People's Hospital (Affiliated People's Hospital), Hangzhou Medical College, Hangzhou, Zhejiang, China.

#These authors contributed equally to this work.

*Address correspondence to [yangleixiang@hmc.edu.cn](mailto:yangleixiang@hmc.edu.cn) ; chenlinjie@hmc.edu.cn.

Corresponding Authors

**Leixiang Yang**, Department of Genetic and Genomic Medicine, Zhejiang Provincial People’s Hospital, No. 158, Shangtang Road, Gongshu District, Hangzhou, Zhejiang, 310014, China. [yangleixiang@hmc.edu.cn](mailto:yangleixiang@hmc.edu.cn).

**Linjie Chen**, Department of Clinical Laboratory and Bioengineering, Hangzhou Medical College, No.8, Yikang ST, Lin’an District, Hangzhou, Zhejiang, 311399, China. chenlinjie@hmc.edu.cn.

**Supplementary Information**

Table S1 Primer sequences used in the manuscript

| Primers | Forward (5'-3') | Reverse (5'-3') |
| --- | --- | --- |
| Bcl2 | GTGGTGGAGGAGCTCTTCAG | ACAGTTCCACAAAGGCATCC |
| Bcl-xL | GTAAACTGGGGTCGCATTGT | TGCTGCATTGTTCCCATAGA |
| p27 | ATGTCAAACGTGCGAGTGTC | TCTCTGCAGTGCTTCTCCAA |
| Bcl-xL shRNA1 | CCGGGCTCACTCTTCAGTCGGAAATCTCGAGATTTCCGACTGAAGAGTGAGCTTTTTG | AATTCAAAAAGCTCACTCTTCAGTCGGAAATCTCGAGATTTCCGACTGAAGAGTGAGC |
| Bcl-xL shRNA2 | CCGGGTGGAACTCTATGGGAACAATCTCGAGATTGTTCCCATAGAGTTCCACTTTTTG | AATTCAAAAAGTGGAACTCTATGGGAACAATCTCGAGATTGTTCCCATAGAGTTCCAC |
| Bcl-xL shRNA3 | CCGGGTTTAGTGATGTGGAAGAGAACTCGAGTTCTCTTCCACATCACTAAACTTTTTG | AATTCAAAAAGTTTAGTGATGTGGAAGAGAACTCGAGTTCTCTTCCACATCACTAAAC |
| Bcl2 shRNA1 | CCGGTGGATGACTGAGTACCTGAACCTCGAGGTTCAGGTACTCAGTCATCCATTTTTG | AATTCAAAAATGGATGACTGAGTACCTGAACCTCGAGGTTCAGGTACTCAGTCATCCA |
| Bcl2 shRNA2 | CCGGGTGATGAAGTACATCCATTATCTCGAGATAATGGATGTACTTCATCACTTTTTG | AATTCAAAAAGTGATGAAGTACATCCATTAT  CTCGAG ATAATGGATGTACTTCATCAC |
| Bcl2 shRNA3 | CCGGCCGGGAGATAGTGATGAAGTACTCGAG TACTTCATCACTATCTCCCGGTTTTTG | AATTCAAAAACCGGGAGATAGTGATGAAGTACTCGAG TACTTCATCACTATCTCCCGG |
| GAPDH | TGACAACTTTGGTATYCGTGGAAGG | AGGCAGGGATGATGTTCTGGAGAG |

Figure S1


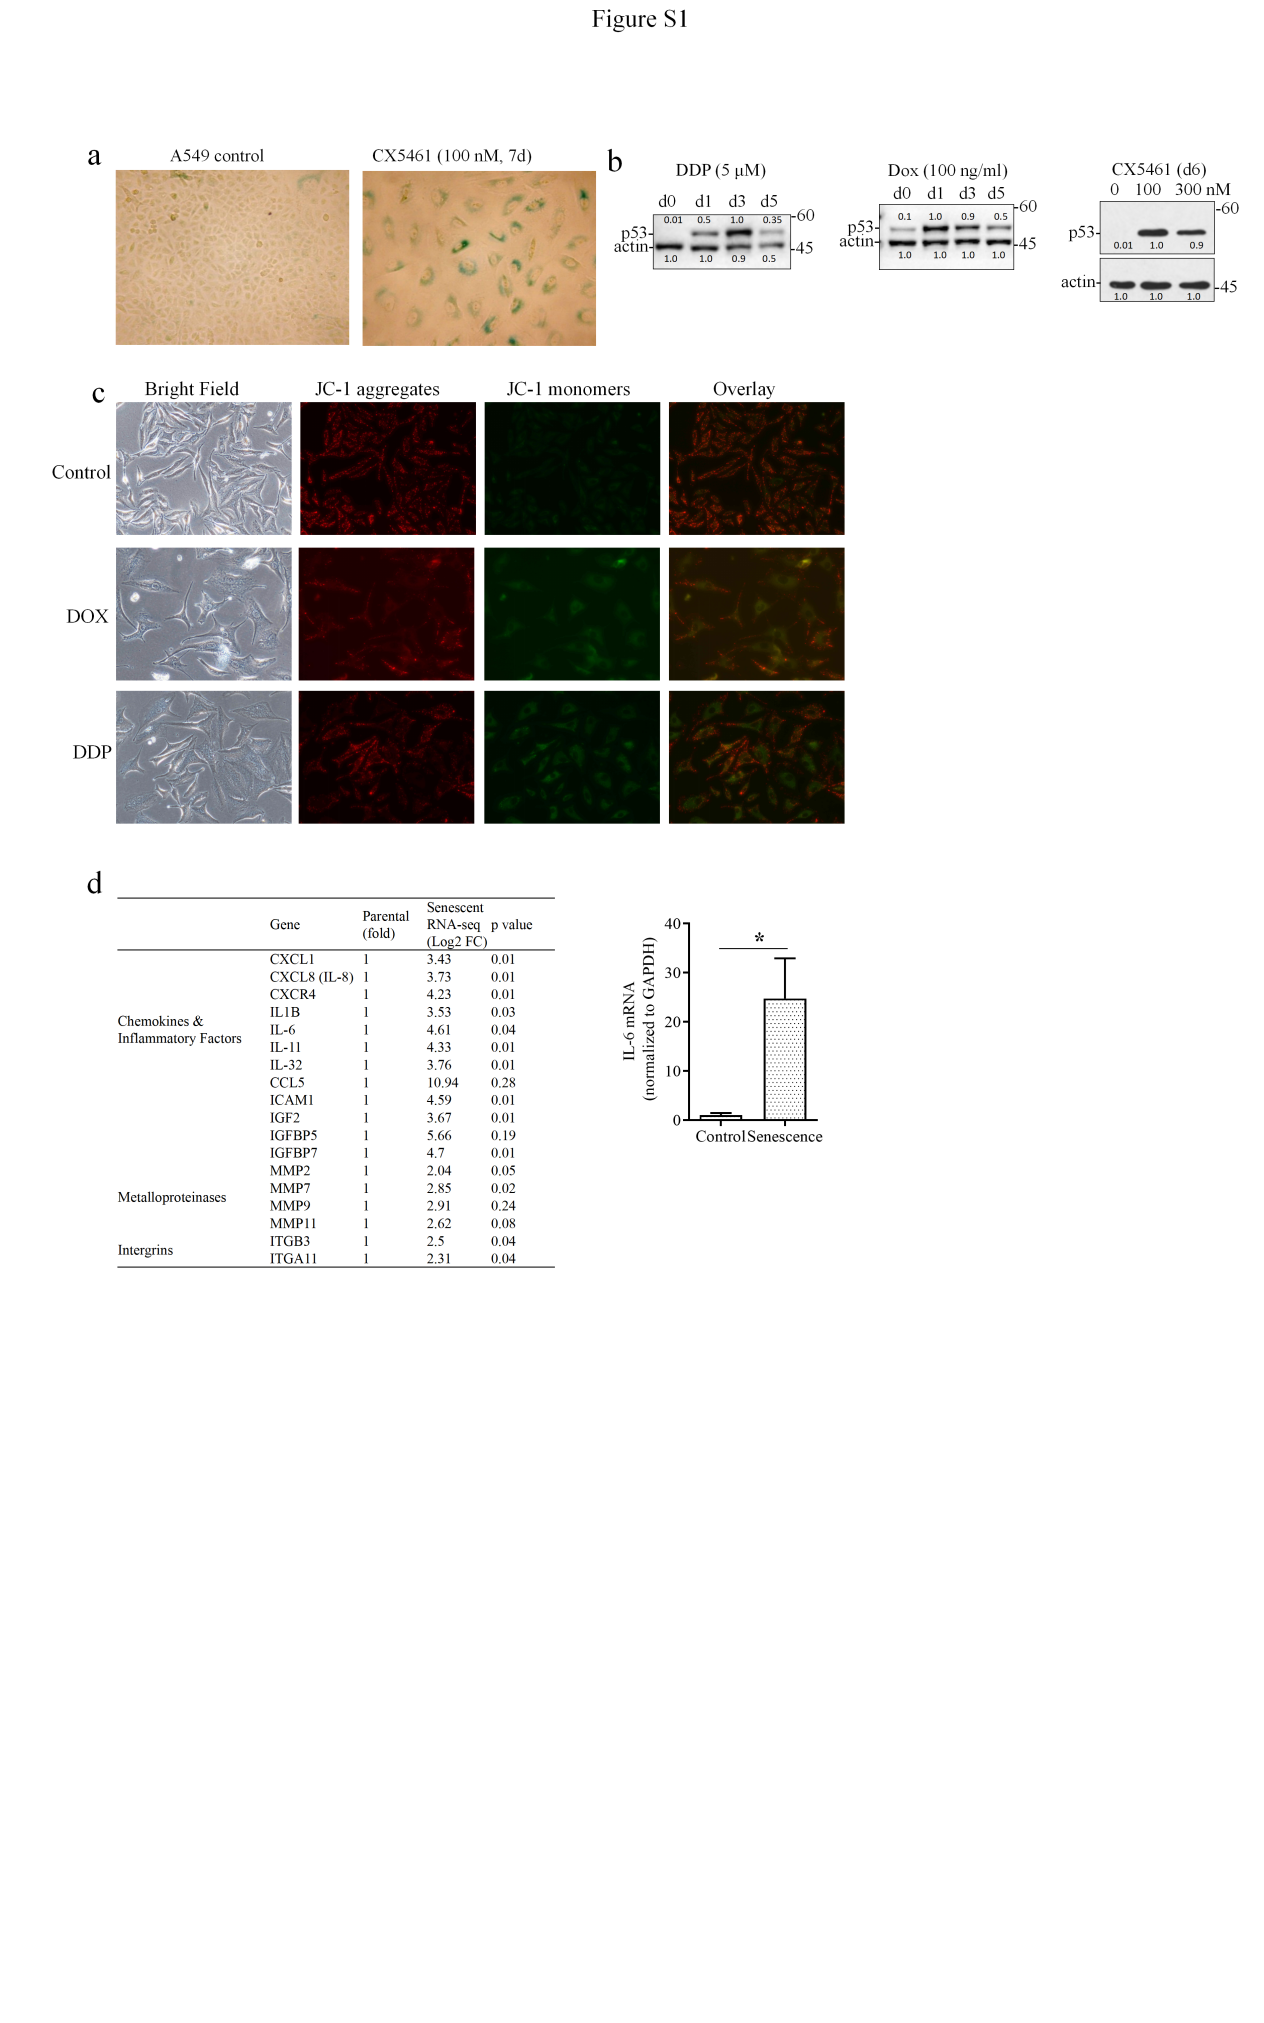


Figure S1. Chemotherapy drugs induce cell senescence. (a) A549 cells were treated with 100 nM CX5461 for 7 days, and then cells were stained for SA-β-galactosidase activity. (b) A549 cells were treated with DDP (5 μM), Dox (100 ng/ml), CX5461 (100, 300 nM) for indicated time, and the p53 expression was detected by WB. The first antibodies of p53 and actin were incubated together for samples treated with DDP and Dox. Original blots are presented in Supplementary Figure S14. (c) A549 cells were treated with DDP (5 μM), or Dox (100 ng/ml) for 7 days, then the mitochondrial membrane potential was measured by fluorescein JC-1 and observed under a confocal microscope. (d) Up-regulated genes in Dox-induced senescent cells compared with the parental cells by RNA-seq and the mRNA level of IL-6 was validated by qPCR.

Figure S2


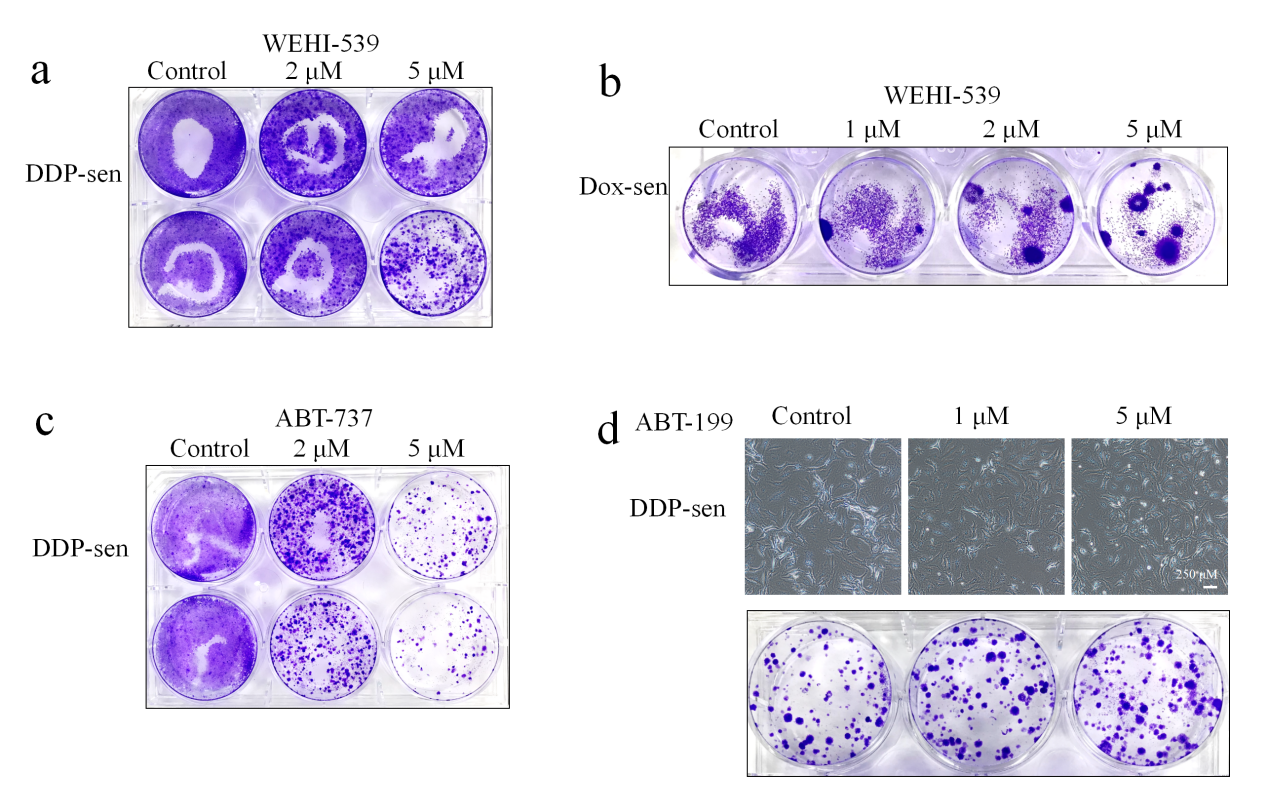


Figure S2. Bcl-xL inhibition promotes senescence escape. (a-b) A549 cells were treated with 5 μM DDP (a) or 100 ng/ml Dox (b) for 7 days to induce senescence . Then cells were treated with different concentrations of WEHI-539 for 3 days. Colony formation was detected using crystal violet until colonies were visible. (c) A549 cells were treated with 5 μM DDP for 7 days, followed by the treatment with different concentrations of ABT-737 for 3 days. Then cells were cultured in drug-free medium until colonies were visible. The colonies were stained with crystal violet. (d) A549 cells were treated with 5 μM of DDP for 7 days, followed by the treatment with different concentrations of ABT-199 for 3 days. Cell morphology was photographed under microscope and colony formation was detected by crystal violet staining.

Figure S3


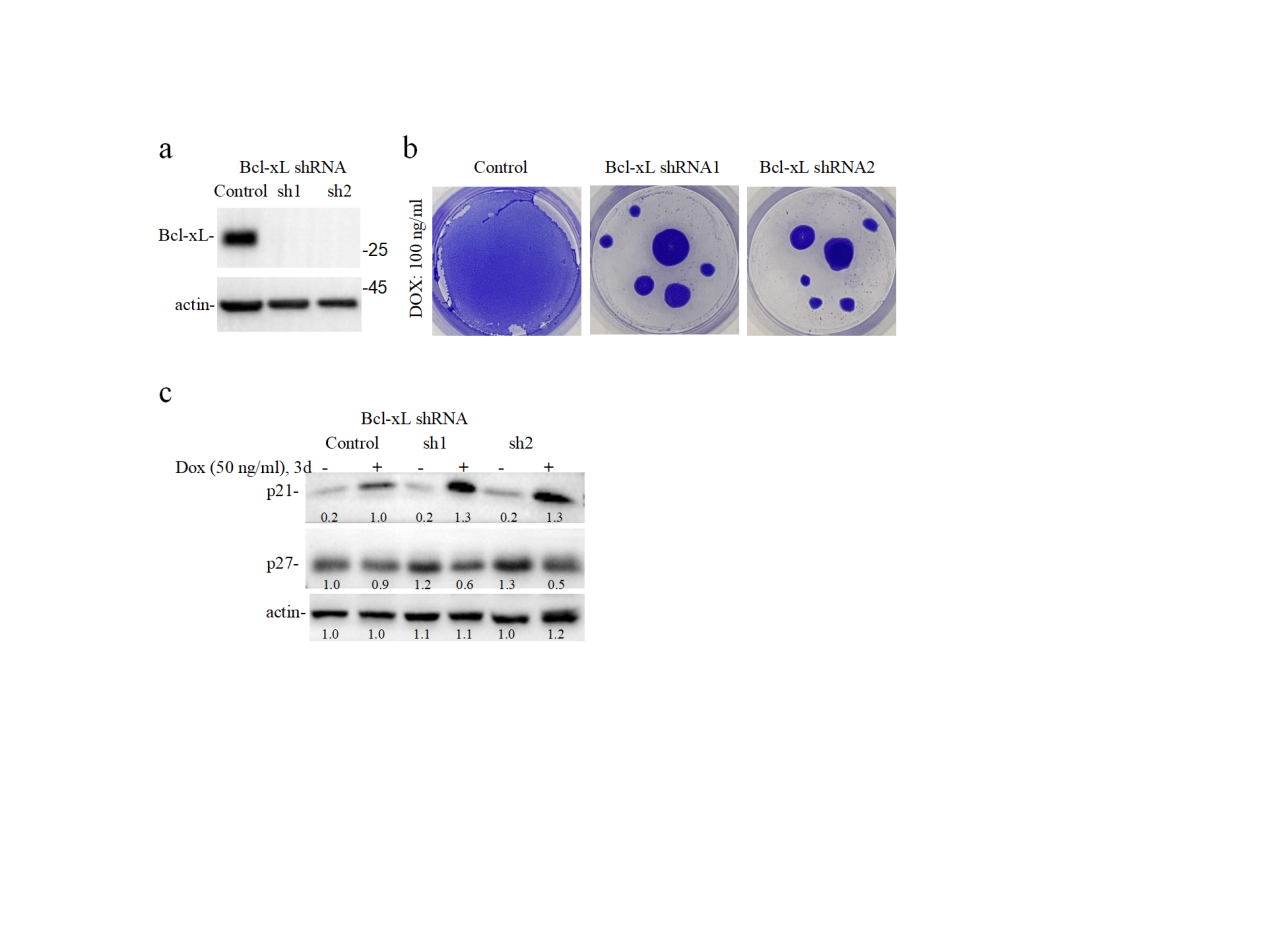


Figure S3. Knockdown of Bcl-xL reduces p27 expression in PC-9 cells. (a) Bcl-xL expression in Bcl-xL shRNA treated PC9 cells. (b) PC9 cells with stable Bcl-xL knockdown were treated with 100 ng/ml doxorubicin (Dox) for 7 days to induce senescence. Following treatment, the cells were cultured in drug-free medium until visible colonies formed, after which the colonies were stained with crystal violet. (c) Bcl-xL knockdown PC9 cells and control cells were treated with 100 ng/ml doxorubicin (Dox) for 3 days, after which the expression levels of p27 and p21 were analyzed by western blot. Original blots are presented in Supplementary Figure S15.

Figure S4


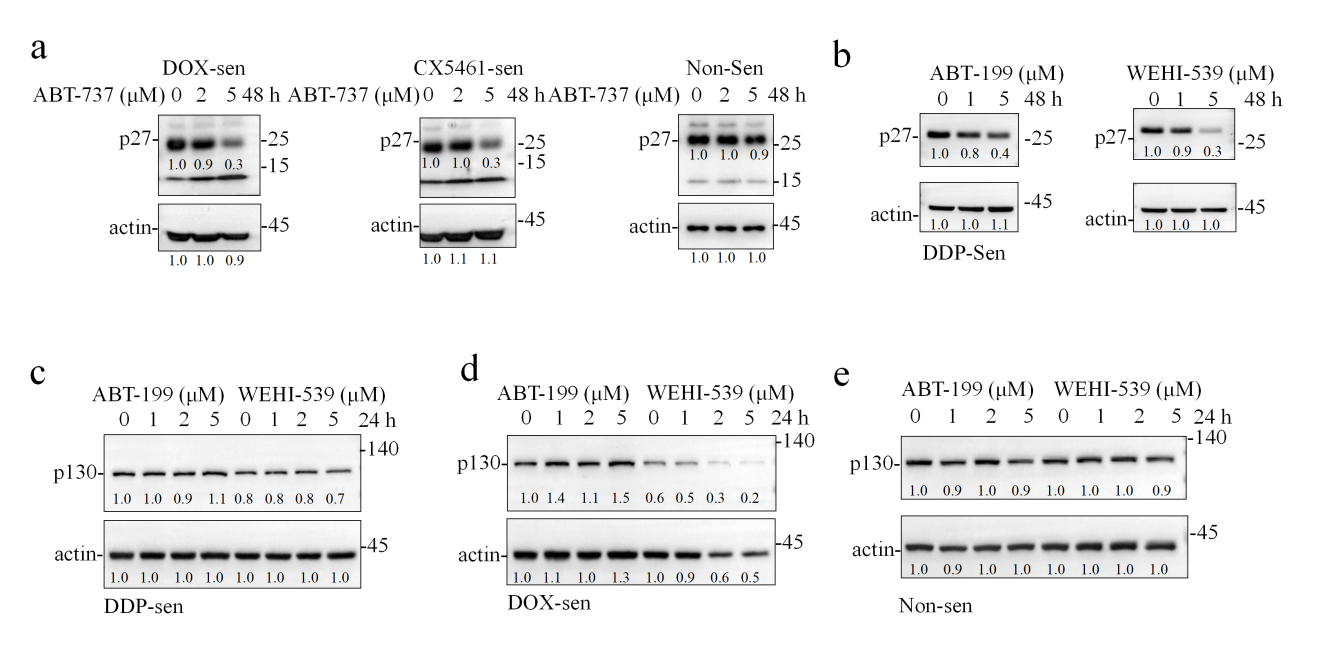


Figure S4. Inactivation of Bcl-xL reduces p27 expression in senescent cells. (a) A549 cells were treated with or without Dox (100 ng/ml), or CX5461 (100 nM) for 7 days, followed by treatment with ABT-737 (2 - 5 μM) for 48 h. Then cells were collected to analyze the expression of p27 by western blot. (b) A549 cells were treated with 5 μM of DDP for 7 days, followed by treatment with different concentrations of ABT-199 or WEHI-539 for 48 h. The expression of p27 was detected by western blot. (c-e) The expression of p130 in DDP-induced senescent (c), Dox-induced senescent (d) and non-senescent (e) A549 cells treated with or without different concentrations of Bcl2 or Bcl-xL specific inhibitors for 24 h was analyzed by western blot. Original blots are presented in Supplementary Figure S16.

Figure S5


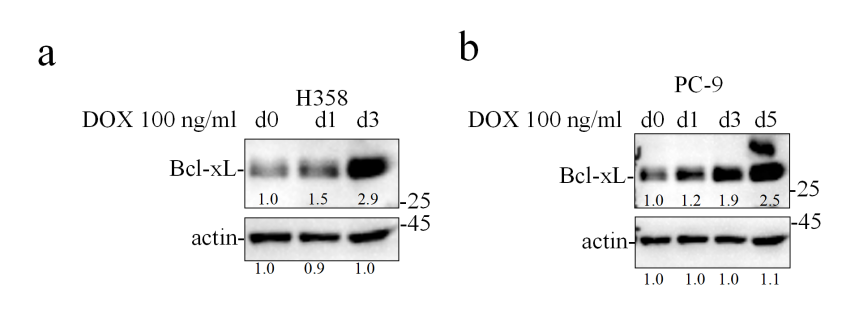


Figure S5. Bcl-xL regulates p27 expression in senescent cells. (a) H358 (p53 null) and (b) PC-9 cells (p53 mutant) were treated with Dox (100 ng/ml) for 0 - 5 days. The expression of Bcl-xL in drug-treated cells was analyzed by western blot. Original blots are presented in Supplementary Figure S17.

Figure S6


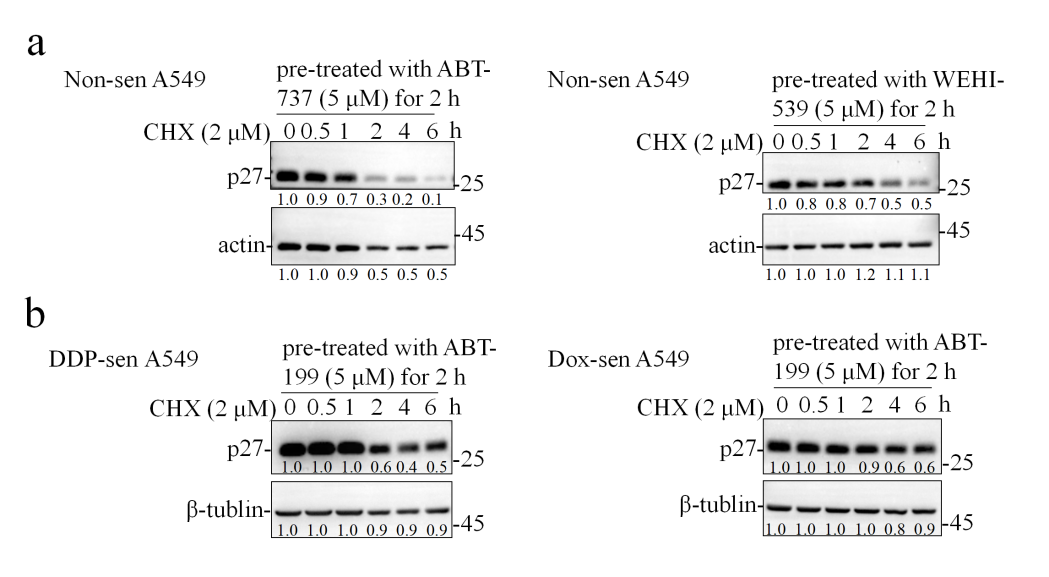


Figure S6. The stability of cell cycle related proteins in non-senescent or senescent cells with or without Bcl2 family inhibitors treatment. (a) A549 cells were pre-treated with ABT-737 (5 μM) or WEHI-539 (5 μM) for 2 h before incubation with CHX (2 μM). The expression of p27 at each time point was analyzed by western blot. (b) DDP or Dox-induced A549 senescent cells were pre-treated with ABT-199 (5 μM) for 2 h before incubation with CHX (2 μM). The expression of p27 at each time point was analyzed by western blot. All the representative western blot images of p27 half-life were qualified by image lab 3.0 software. Original blots are presented in Supplementary Figure S18.

Figure S7


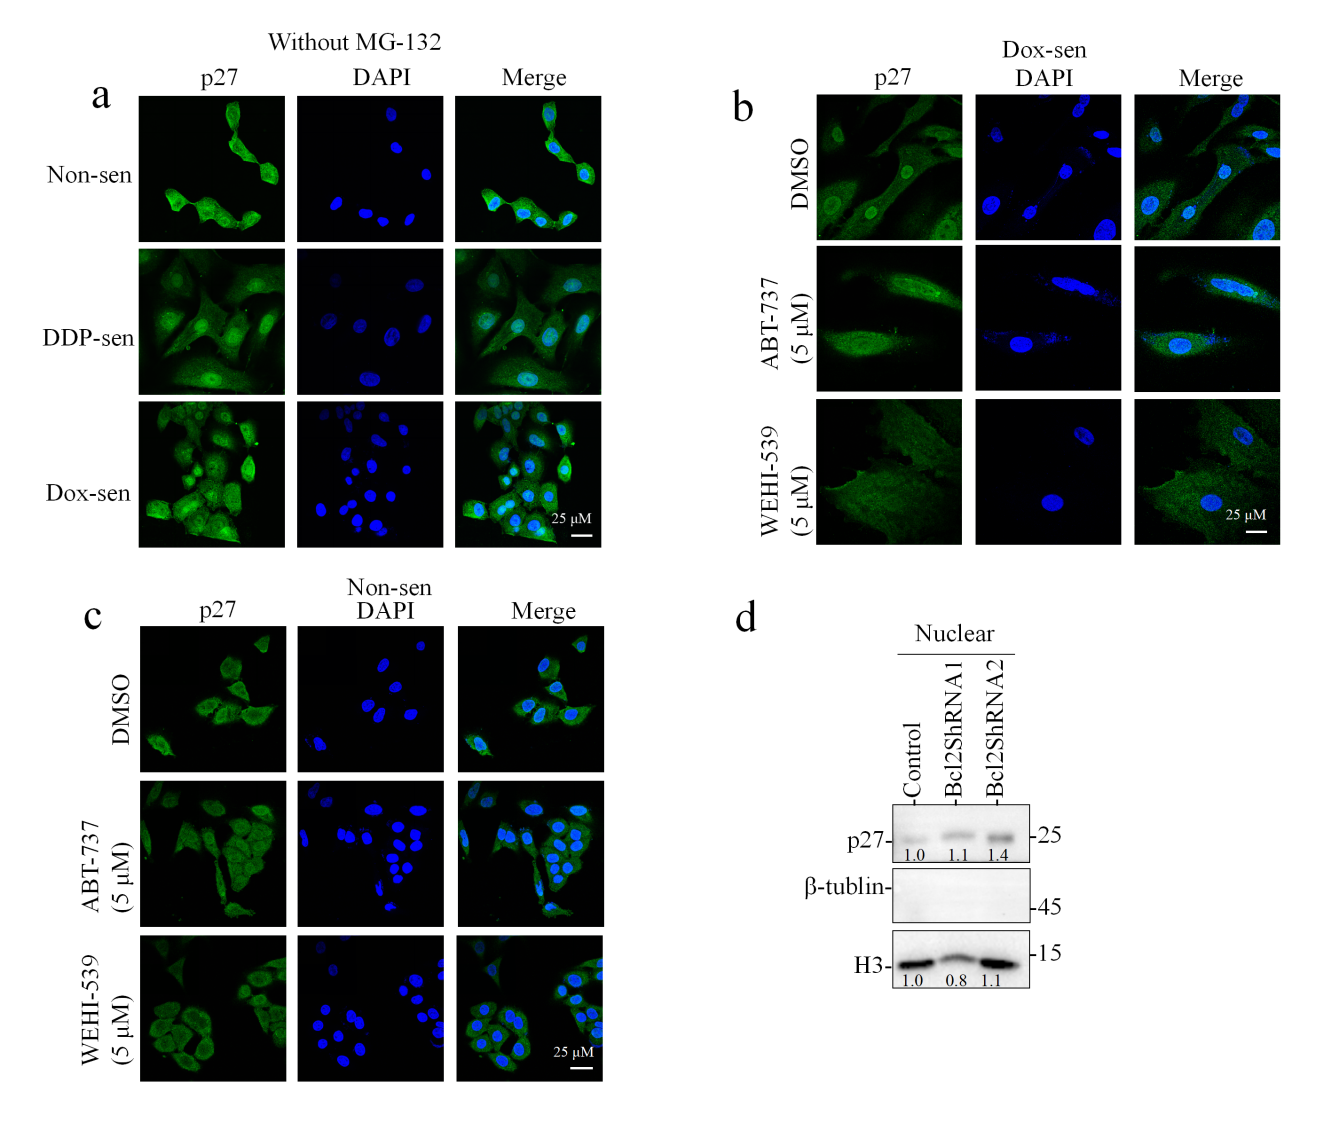


Figure S7. Bcl-xL affects p27 subcellular localization in senescent cells. (a) The localization of p27 in non-senescent and drug induced senescent A549 cells without MG-132 treatment were detected by IF staining and imaged under confocal microscope. (b) Dox-induced senescent cells were treated with 5 μM of Bcl-xL inhibitors for 24 h, then cells were fixed and stained with p27 antibody. The p27 localization was photographed under confocal microscope. (c) A549 cells were treated with 5 μM of Bcl-xL inhibitors for 24 h, then cells were fixed and stained with p27 antibody. The p27 localization was photographed under confocal microscope. (d) A549 cells with or without Bcl2 stable knockdown were collected to analyze the expression of nuclear p27 using nuclear cytoplasmic protein extraction kit, followed by western blot. H3 was the nuclear protein marker and b-tublin was the cytoplasmic protein marker. Original blots are presented in Supplementary Figure S19.
