# Supplementary material for: Bcl-xL Inhibition Disrupts p27 Stability and Promotes Senescence Escape: Insights for Cancer Senotherapy
Source: Research Square preprint supplement (doi:10.21203/rs.3.rs-7250116/v1), 2025-08-18
Supplement: Supplementary file 2 [file 17e499fe95571c88119b1a95.docx]

**Original images for Western blot**

**Figure S8**

| Fig 1e  **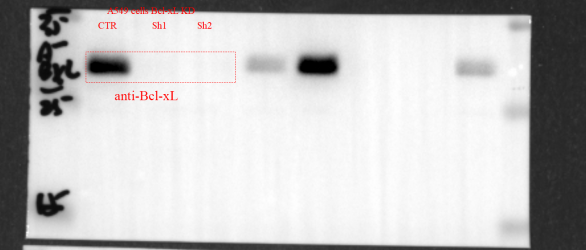**  **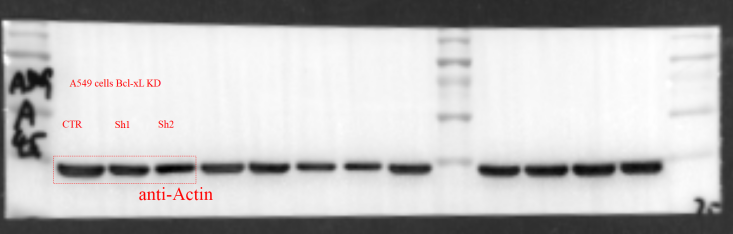** |
| --- |

**Figure S9**

| Fig 2a  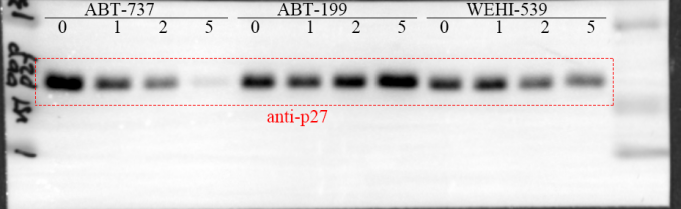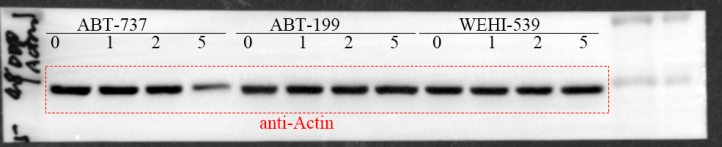 |
| --- |

| Fig 2b  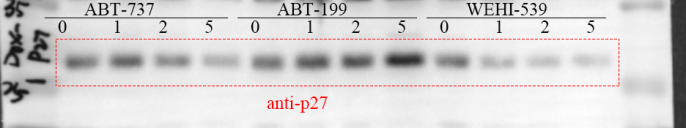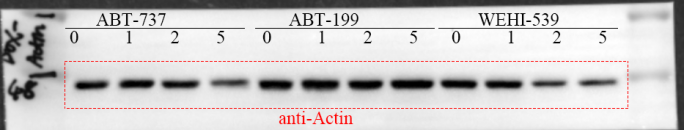 |
| --- |

| Fig 2c  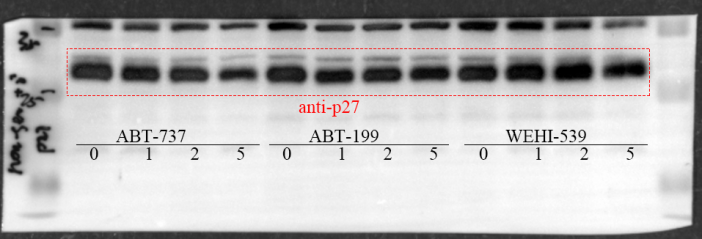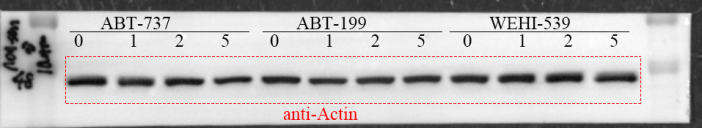 |
| --- |

| Fig 2d  **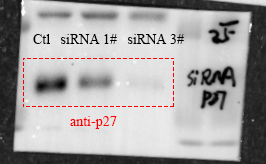**  **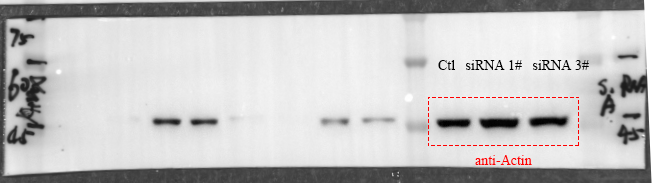** |
| --- |

**Figure S10**

| Fig 3a  **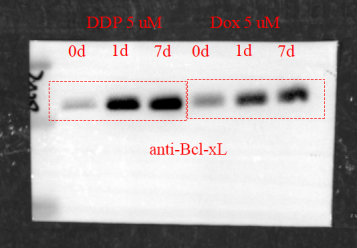**  **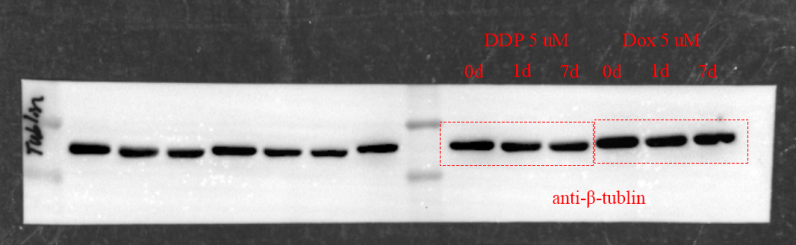** |
| --- |

| Fig 3c  **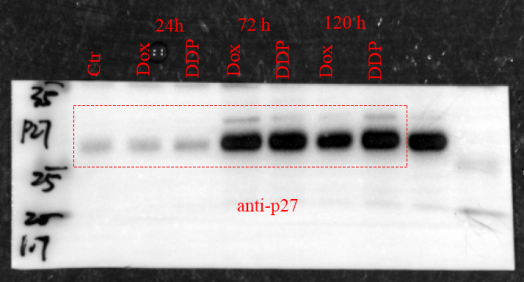**  **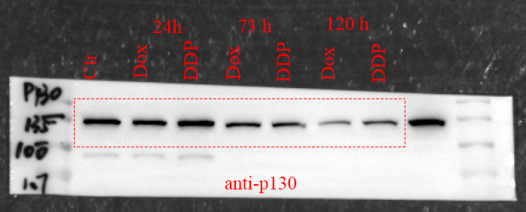**  **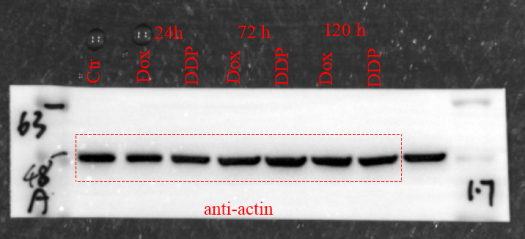** |
| --- |

**Figure S11**

| Fig 4a  **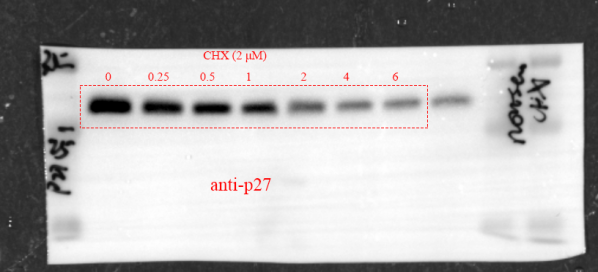**  **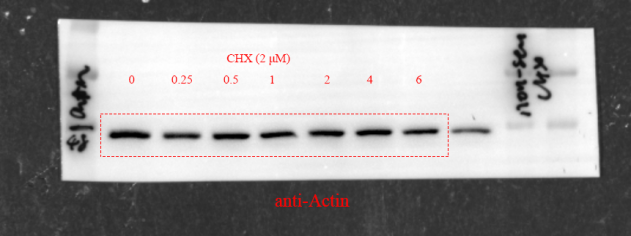** |
| --- |

| Fig 4b  **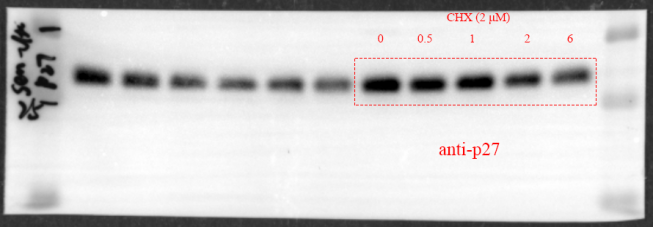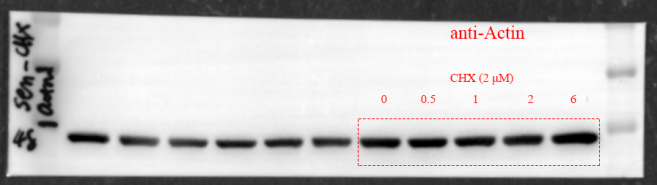** |
| --- |

| Fig 4c  **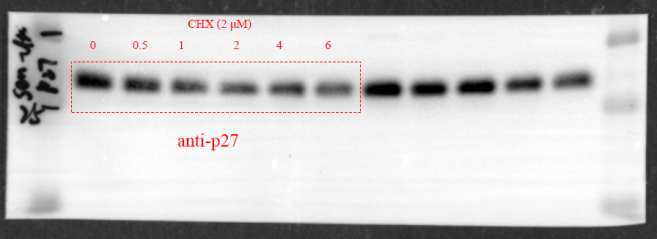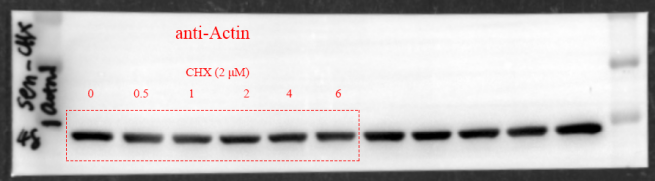** |
| --- |

| Fig 4d  **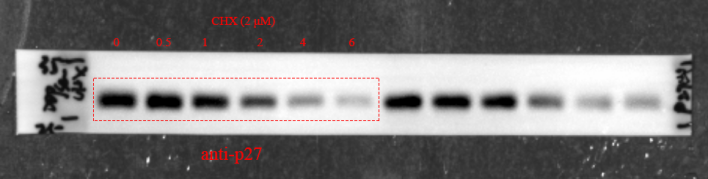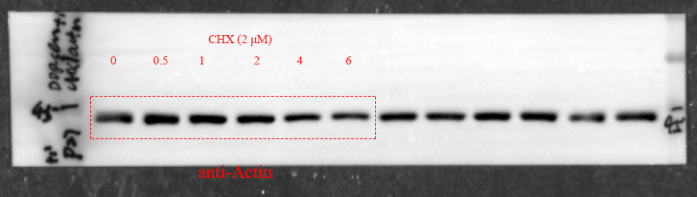** |
| --- |

| Fig 4e  **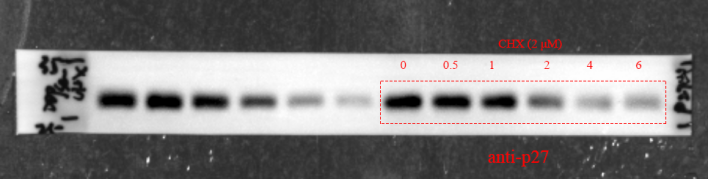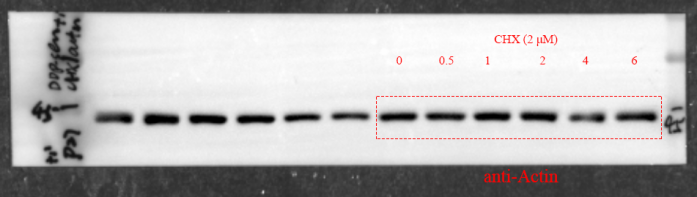** |
| --- |

**Figure S12**

| Fig 5a  **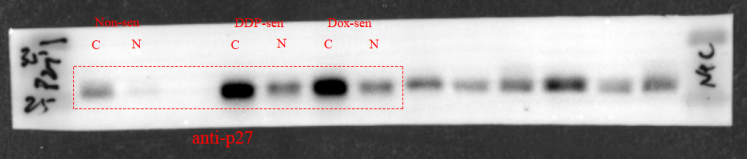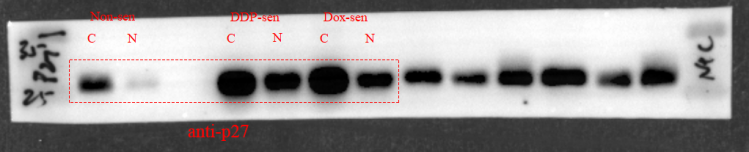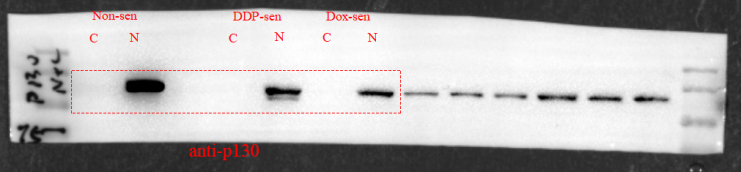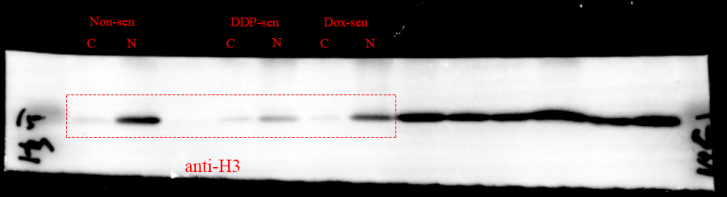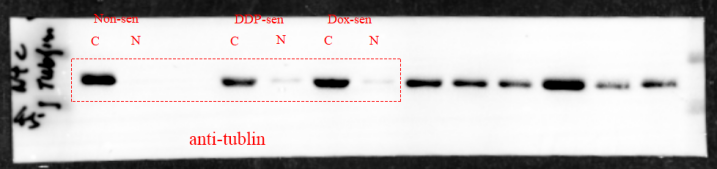** |
| --- |

| Fig 5b  **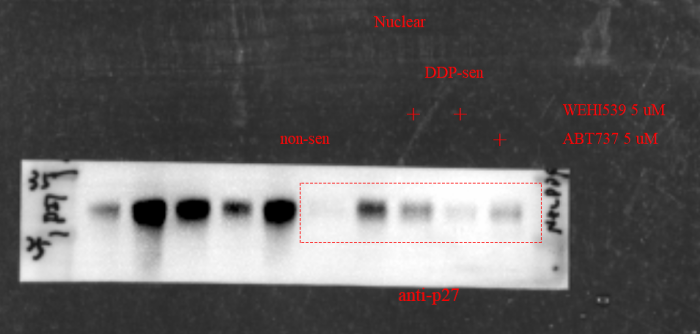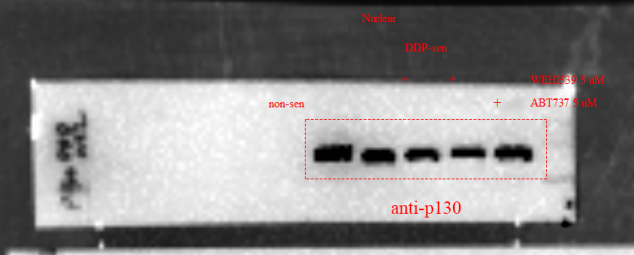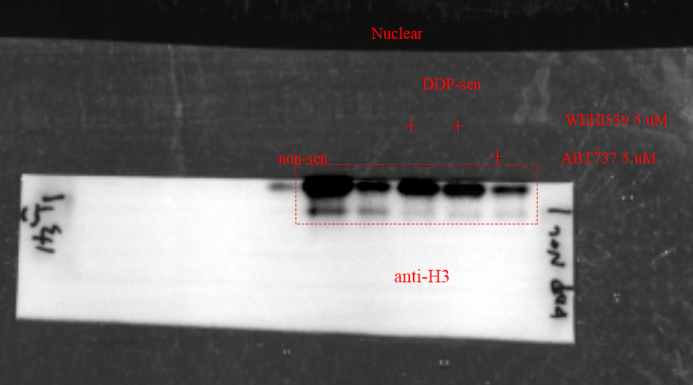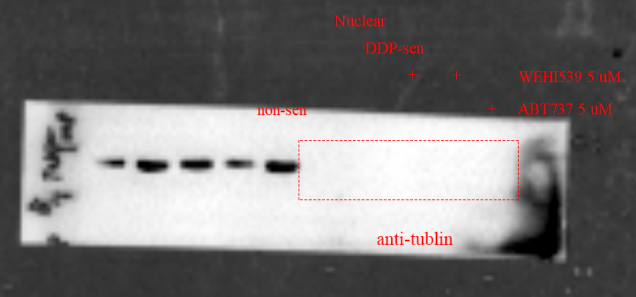** |
| --- |

| Fig 5c  **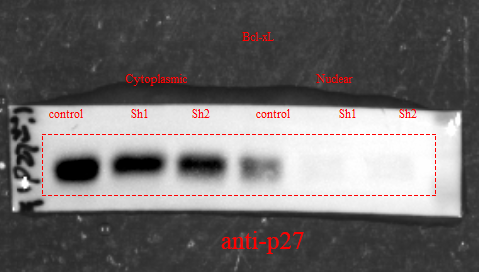**  **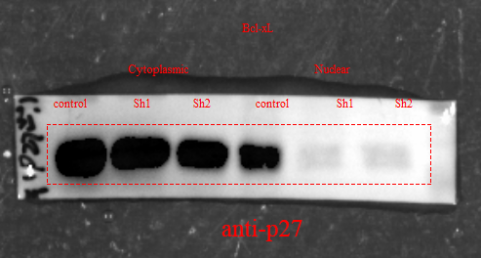**  **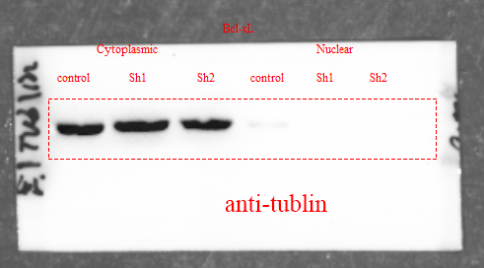**  **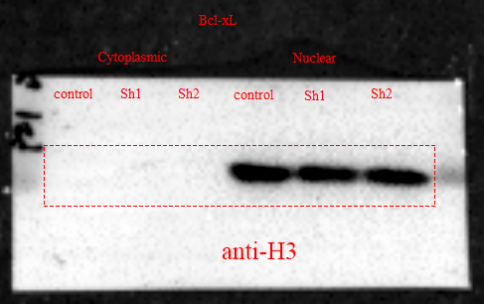** |
| --- |

**Figure S13**

| Fig 6a  **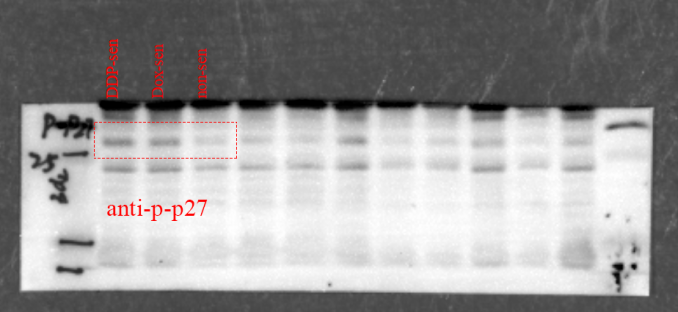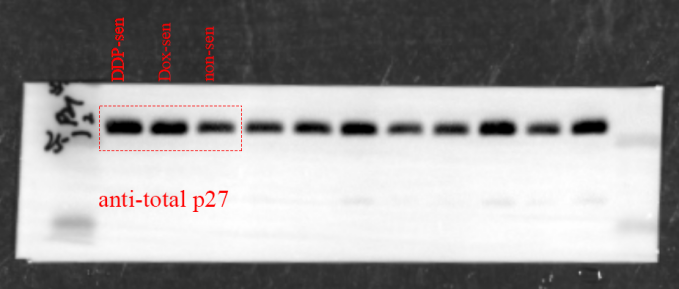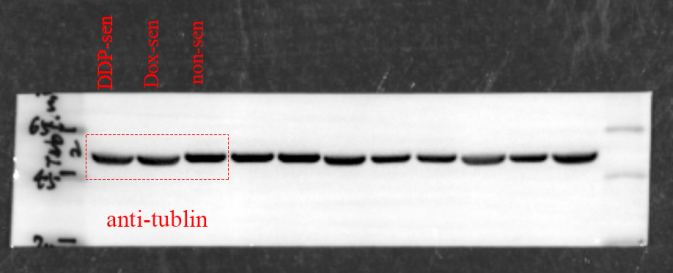** |
| --- |

| Fig 6b  **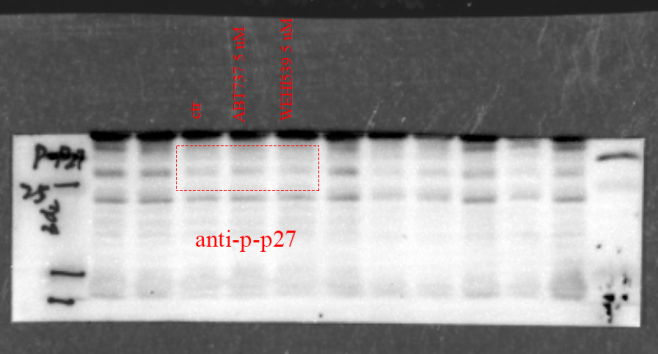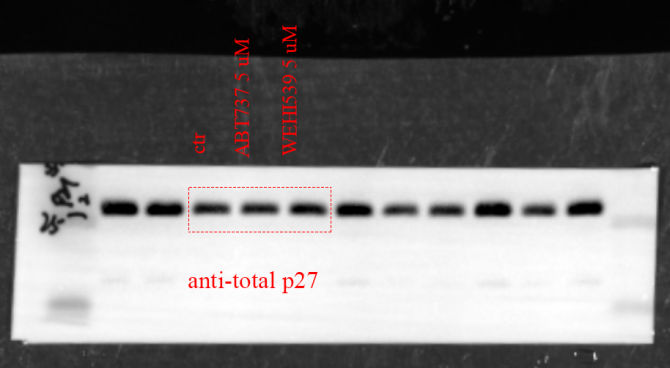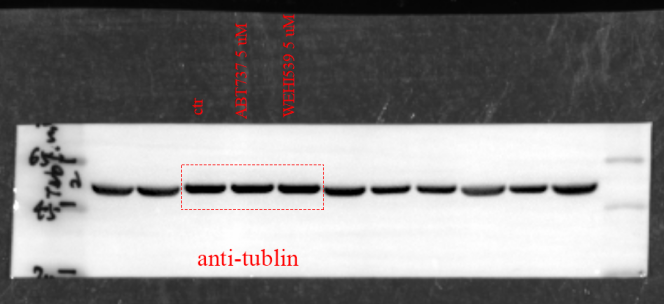** |
| --- |

| Fig 6c  **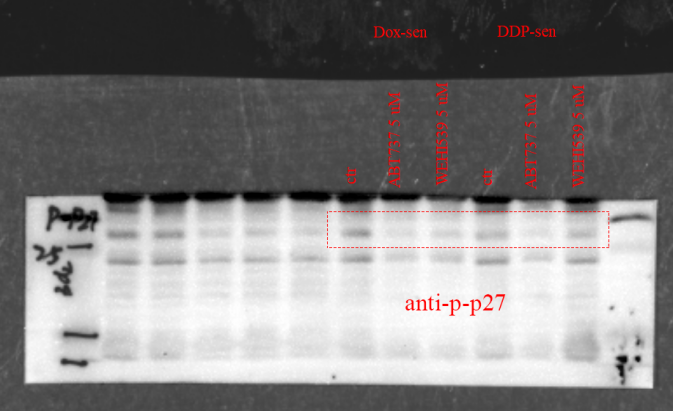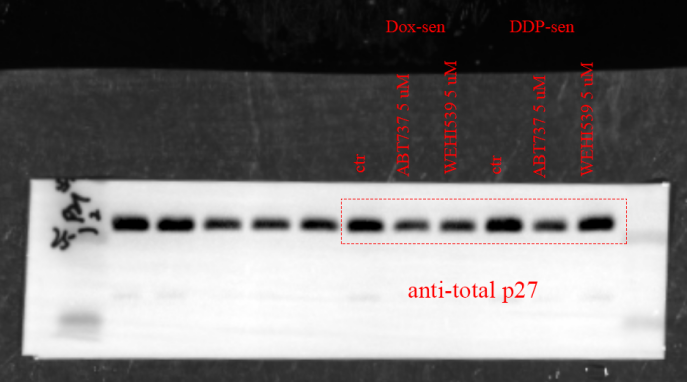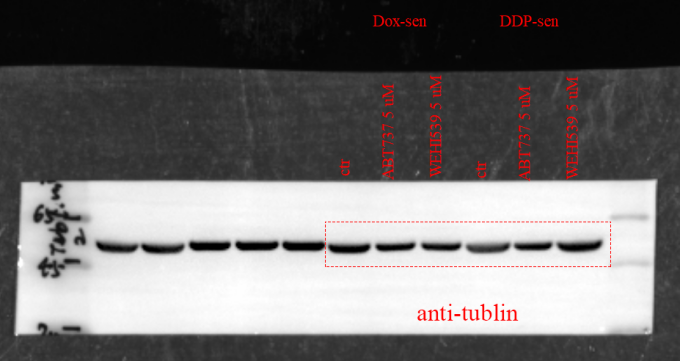** |
| --- |

| Fig 6d  **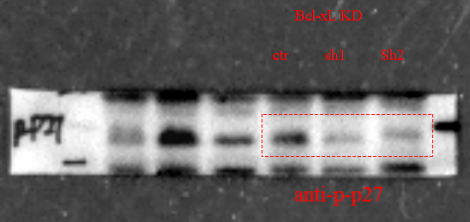**  **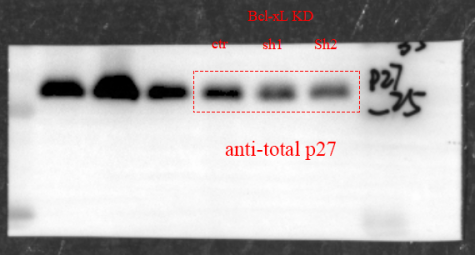**  **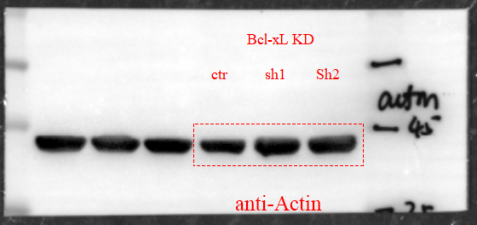**  **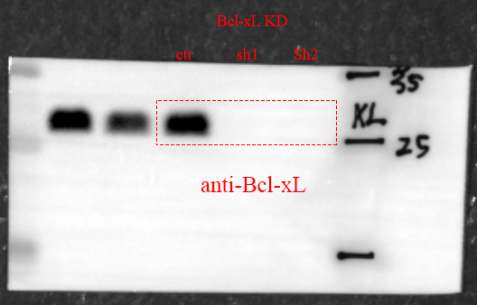**  **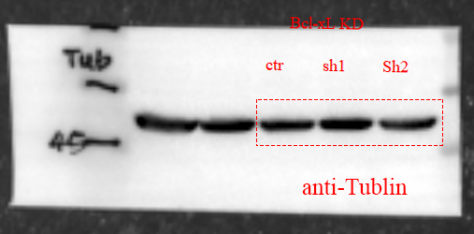** |
| --- |

**Figure S14**

Fig S1b

**
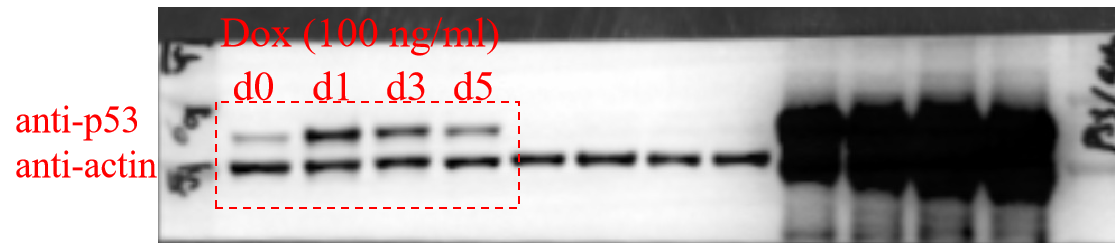
**

**
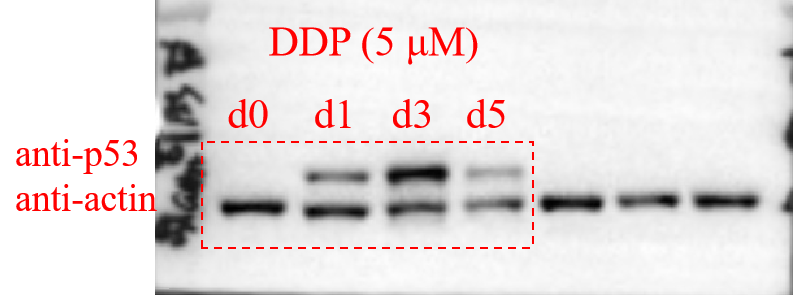
**

**
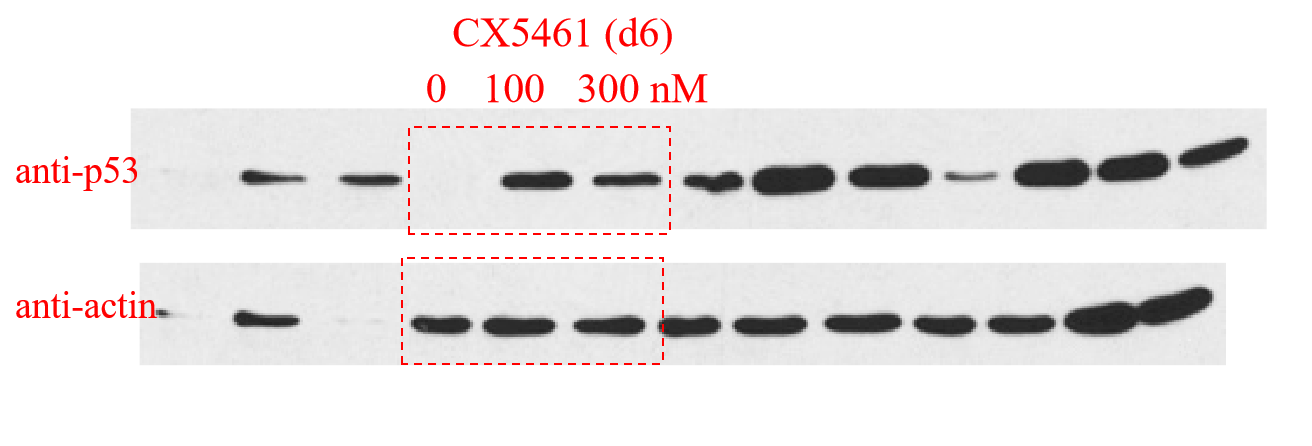
**

**Figure S15**

Fig S3b

**
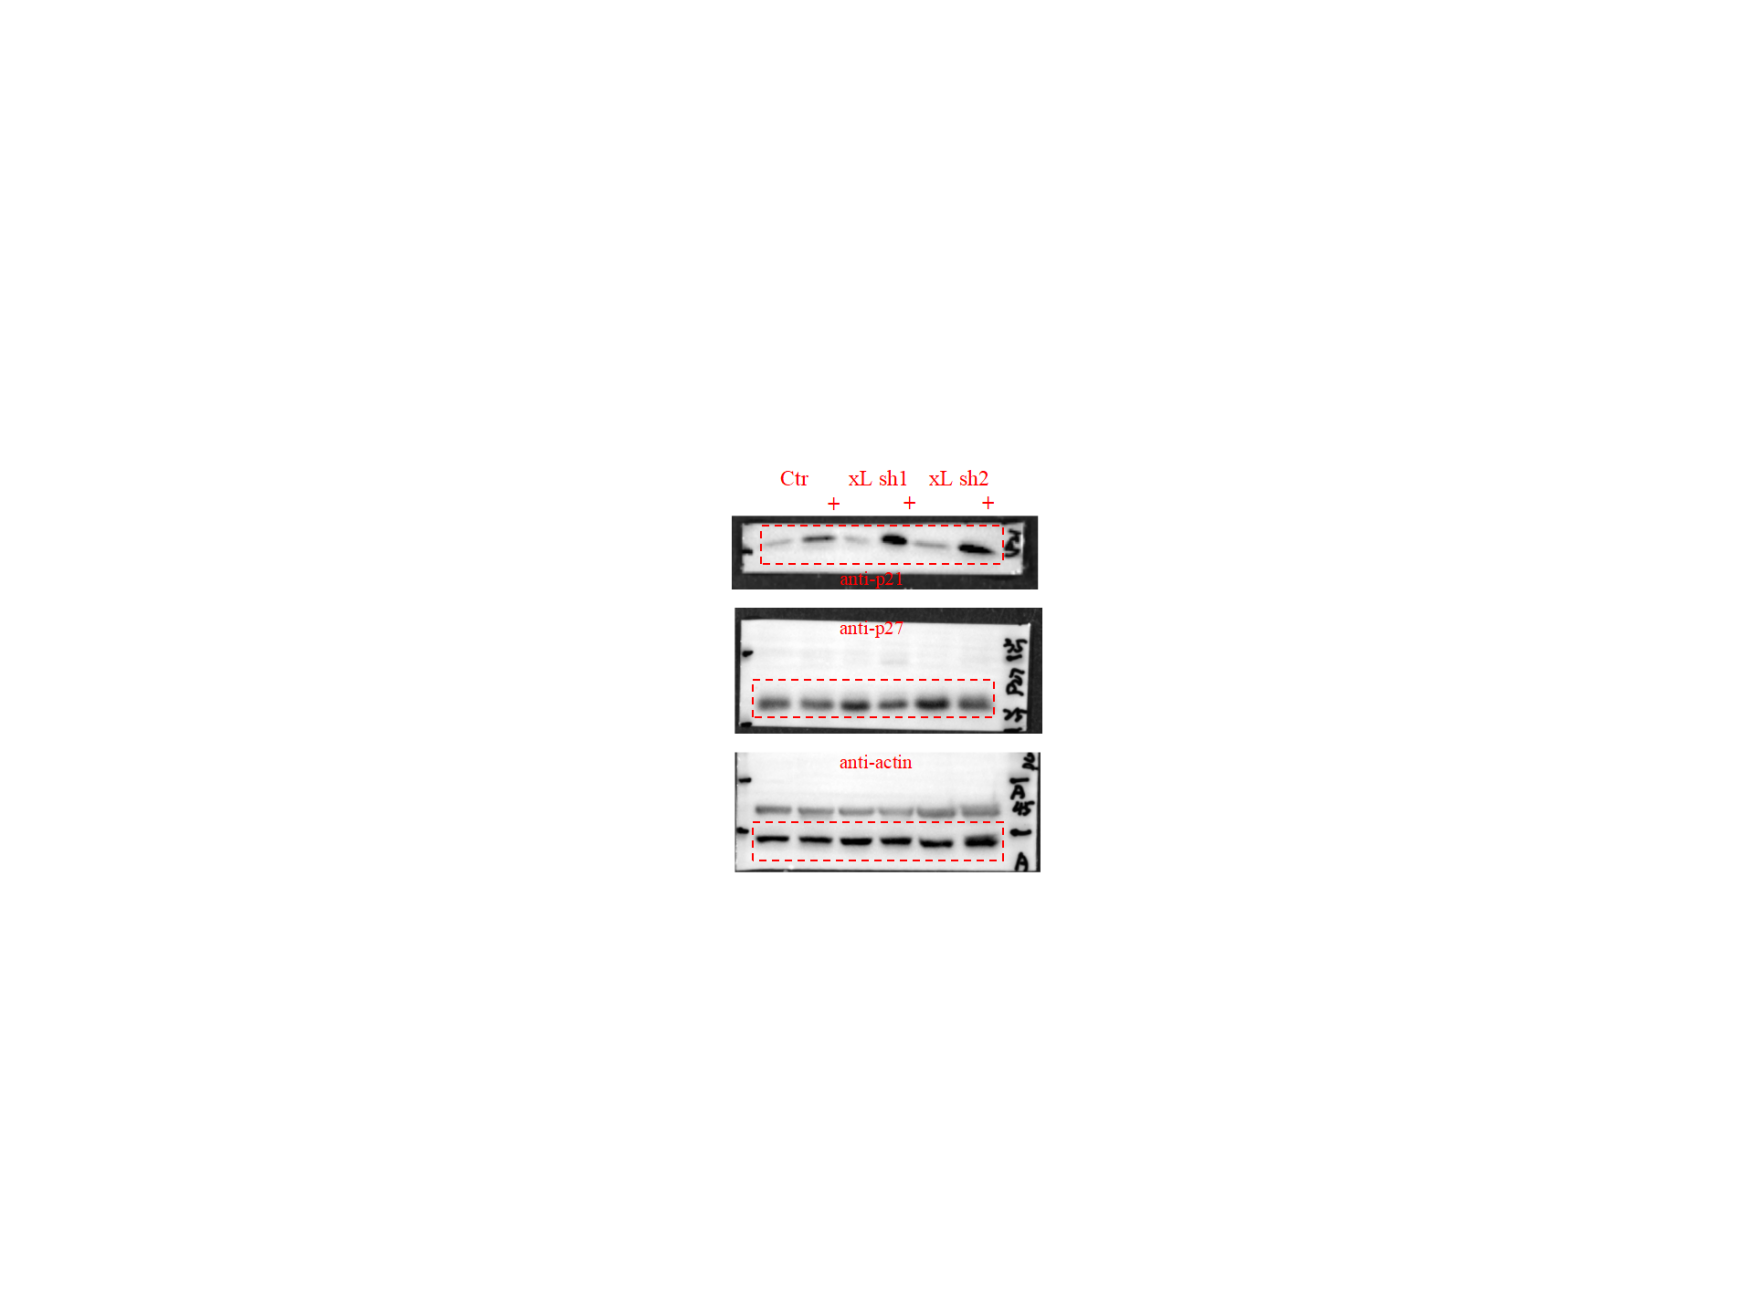
**

**Figure S16**

| Fig S4a  **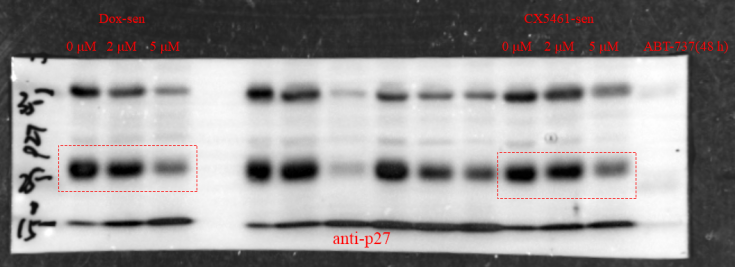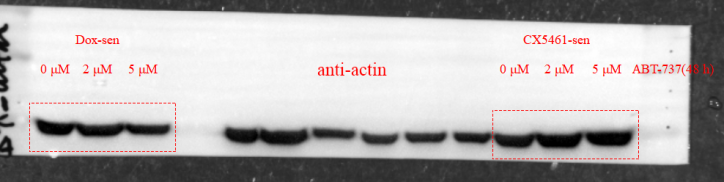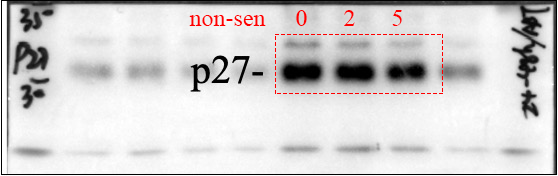**  **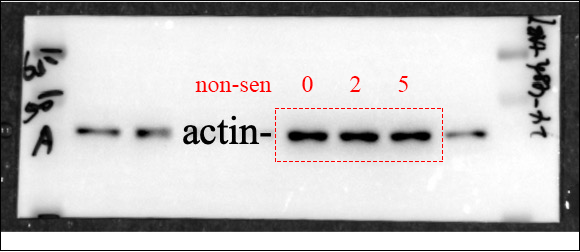** |
| --- |

| Fig S4b  **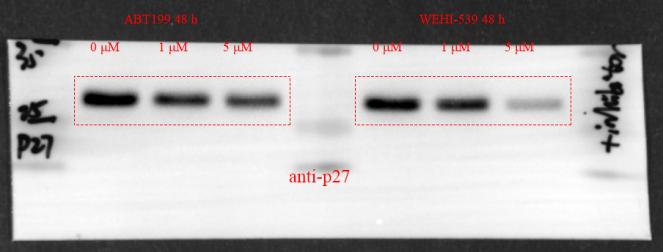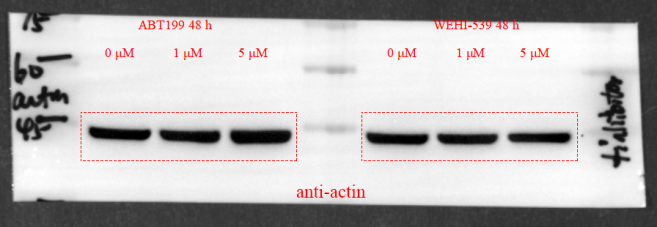** |
| --- |

| Fig S4c  **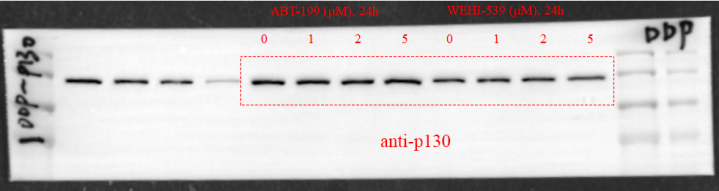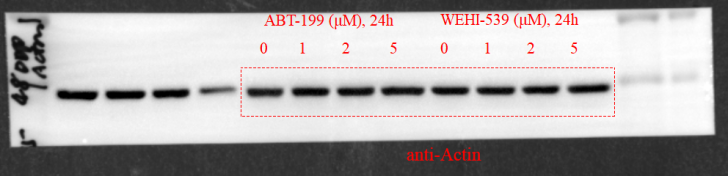** |
| --- |

| Fig S4d  **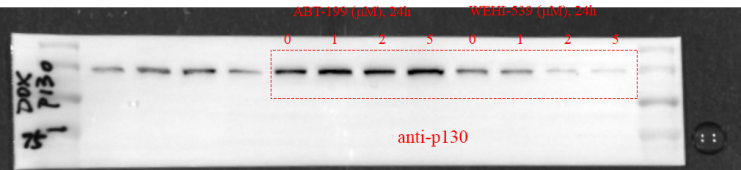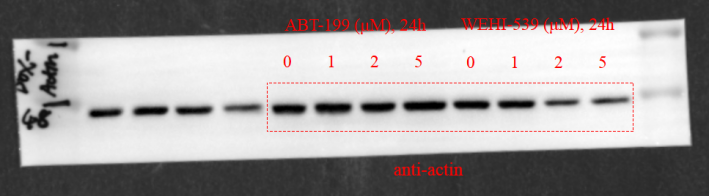** |
| --- |

| Fig S4e  **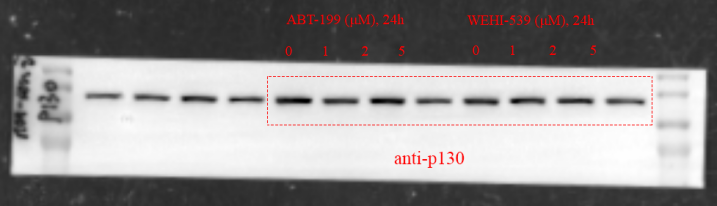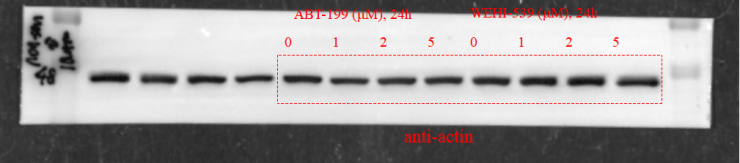** |
| --- |

**Figure S17**

| Fig S5a  **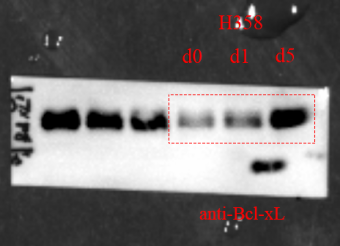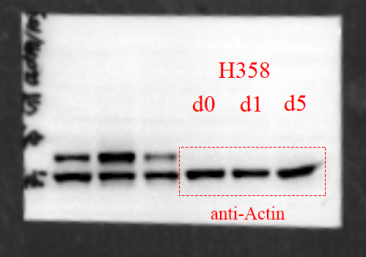** |
| --- |

| Fig S5b  **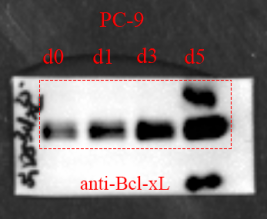**  **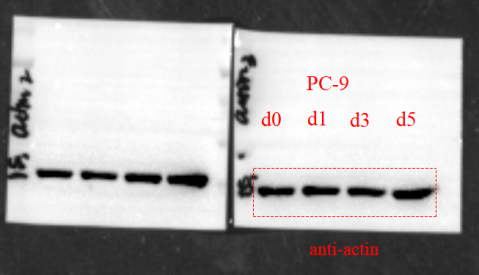** |
| --- |

**Figure S18**

| Fig S6a  **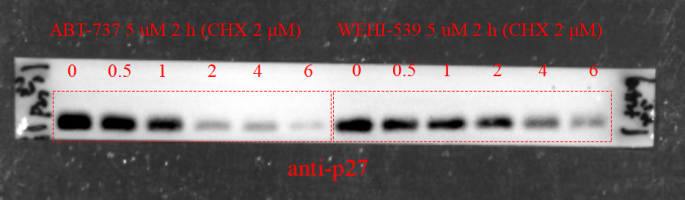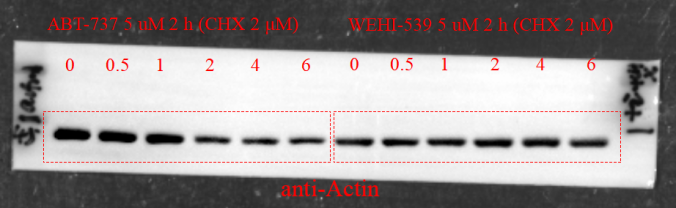** |
| --- |

| Fig S6b  **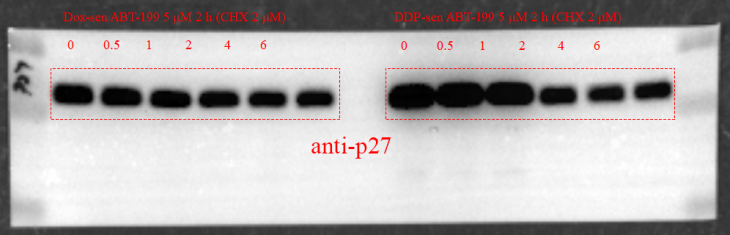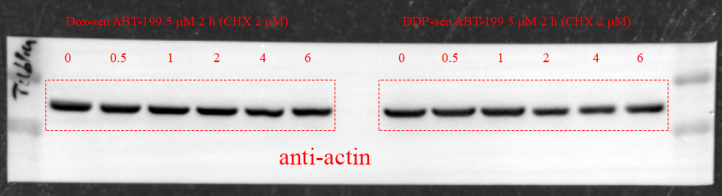** |
| --- |

**Figure S19**

| Fig S7d  **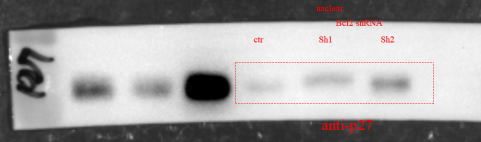**  **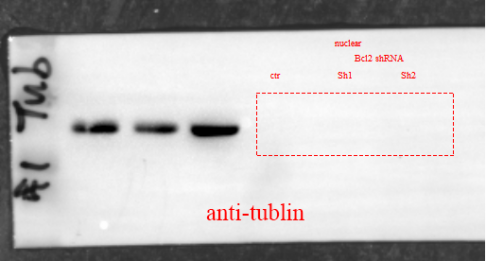**  **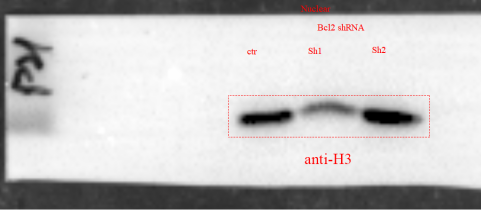** |
| --- |
